# Supplementary material for: Rational design of MgF2catalysts with long-term stability for the dehydrofluorination of 1,1-difluoroethane (HFC-152a)
Source: Royal Society of Chemistry journal article supplement (doi:10.1039/c9ra04250d), 2019-01-01
Supplement: c9ra04250d1.pdf [file c9ra04250d1.pdf]

## Supplementary Materials

### Rational design of MgF<sub>2</sub> catalysts with long-term stability for the dehydrofluorination of 1,1-difluoroethane (HFC-152a)

Haodong Tang,<sup>\*a</sup> Mingming Dang,<sup>b</sup> Yuzhen Li,<sup>a</sup> Lichun Li,<sup>\*b</sup> Wenfeng Han,<sup>a</sup> Zongjian Liu,<sup>b</sup> Ying Li<sup>a</sup> and Xiaonian Li<sup>a</sup>

---

<sup>a</sup> Institute of Industrial Catalysis, Zhejiang University of Technology, Hangzhou, 310014, PR China

<sup>b</sup> College of Chemical Engineering, Zhejiang University of Technology, Hangzhou, 310014, PR China

Corresponding author – Dr Haodong Tang, [tanghd@zjut.edu.cn](mailto:tanghd@zjut.edu.cn); Dr Lichun Li, [lichunli@zjut.edu.cn](mailto:lichunli@zjut.edu.cn);

#### List of figures:

**Figure S1.** Conversion rate as a function of time on stream for three MgF<sub>2</sub> catalysts including MgF<sub>2</sub>-S, MgF<sub>2</sub>-T, and MgF<sub>2</sub>-P at 350 °C.

**Figure S2.** XRD patterns of the MgF<sub>2</sub> catalysts synthesized from precipitation, sol-gel and hard-template methods after calcination at 200, 300 and 350 °C.

**Figure S3.** An example GC spectrum of contents in gas stream after dehydrofluorination of HFC-152a demonstrating the product/reactant distribution. Note that, the peak at 0.907 min represents N<sub>2</sub>; the peak at 2.815 min represents the product PVF; the peak at 5.848 min represents the reactant HFC-152a.

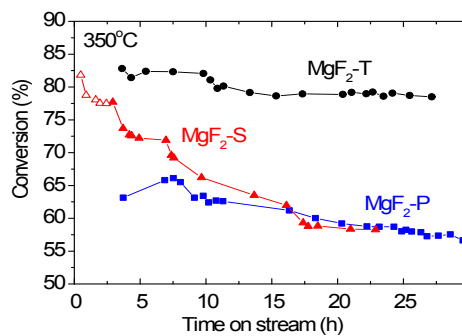

Figure S1. Conversion rate as a function of time on stream for three MgF<sub>2</sub> catalysts including MgF<sub>2</sub>-S, MgF<sub>2</sub>-T, and MgF<sub>2</sub>-P at 350 °C.

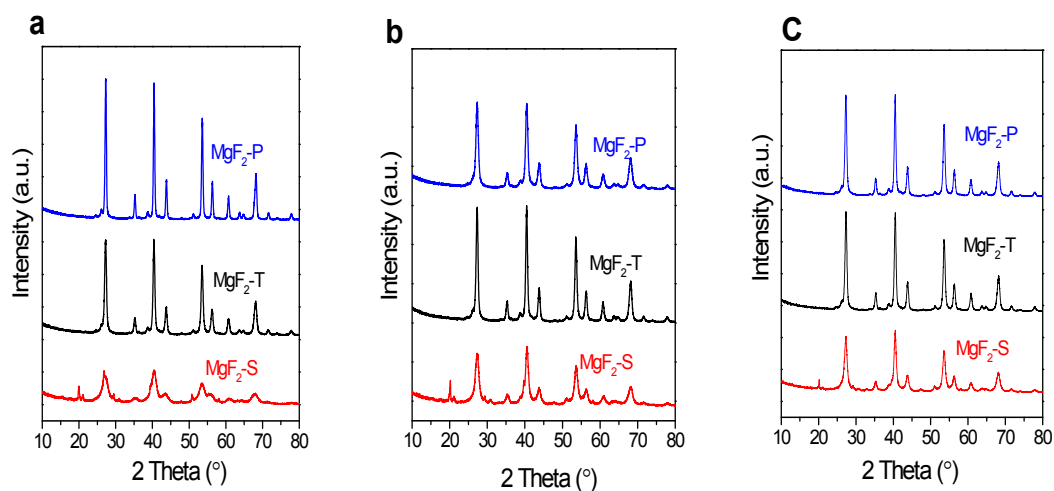

Figure S2. XRD patterns of the MgF<sub>2</sub> catalysts synthesized from precipitation, sol-gel and hard-template methods after calcination at 200, 300 and 350 °C.

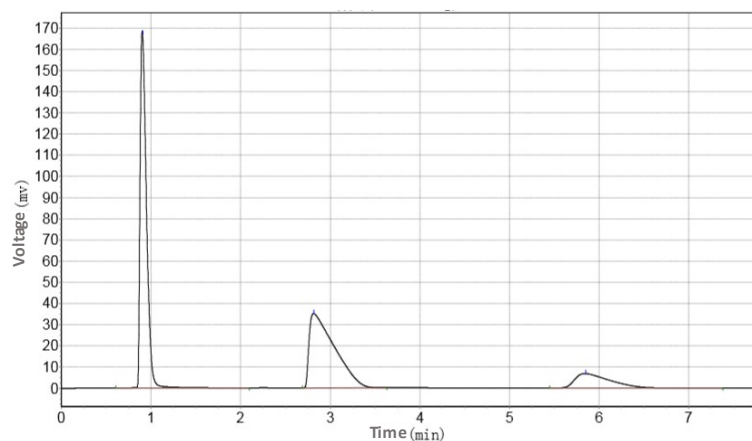

Figure S3. An example GC spectrum of contents in gas stream after dehydrofluorination of HFC-152a demonstrating the product/reactant distribution. Note that, the peak at 0.907 min represents N<sub>2</sub>; the peak at 2.815 min represents the product PVF; the peak at 5.848 min represents the reactant HFC-152a.
